# Supplementary material for: High Performance Gold Nanorods@DNA Self-Assembled Drug-Loading System for Cancer Thermo-Chemotherapy in the Second Near-Infrared Optical Window
Source: MDPI journal article supplement (doi:10.3390/pharmaceutics14051110), 2022-05-23
Supplement: s1 [file s1]

**Supplementary materials for:**

## **High Performance gold nanorods@DNA Self-assembled Drug-loading System for Cancer Thermo-chemotherapy in the Second Near-Infrared Optical Window**

Wei Chang<sup>1,2†</sup>, Junfeng Wang<sup>1#</sup>, Jing Zhang<sup>1</sup>, Qing Ling<sup>1,2</sup>, Yumei Li<sup>3,\*</sup>, and Jie Wang<sup>1,\*</sup>

<sup>1</sup> Inflammation and Immune Mediated Diseases Laboratory of Anhui Province, School of Pharmacy, Anhui Medical University, Hefei 230032, China; changw@bbmc.edu.cn (W.C.); wjf2353258194@outlook.com (J.W.); zhangjing10087@outlook.com (J.Z.); lingqing22luan@163.com (Q.L.)

<sup>2</sup> Anhui Engineering Technology Research Center of Biochemical Pharmaceuticals, Faculty of Pharmacy, Bengbu Medical College, Bengbu 233030, China

<sup>3</sup> School of Basic Medicine, Gannan Medical University, Ganzhou 341000, China

\* Correspondence: Yumei.li@gmu.edu.cn (Y.L.); 2020500067@ahmu.edu.cn (J.W.);

Tel.: +86-(13)-055271587 (Y.L.); +86-(13)-055165161176 (J.W.)

† These authors contributed equally to this work.

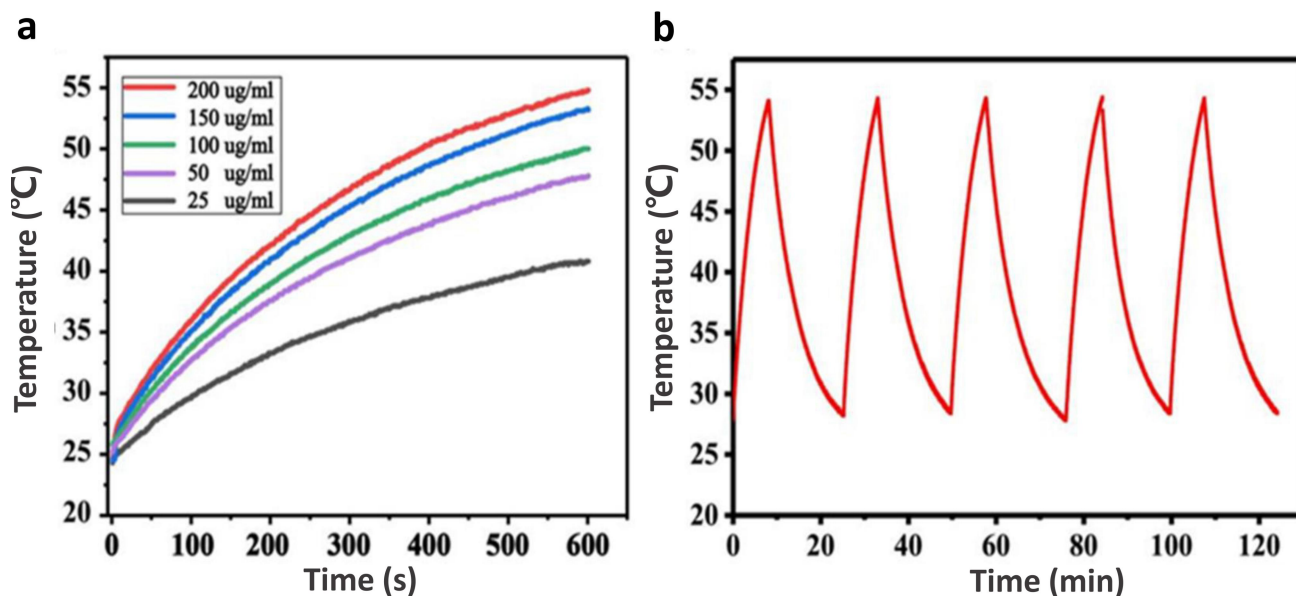

**Figure S1.** Photothermal efficiency analysis of GNR@CTA. (a) The photothermal performance of the GNR@CTA with different concentrations of Au irradiated for 10 min by  $0.8 \text{ W}\cdot\text{cm}^{-2}$  808 nm laser irradiation. (b) Heating and cooling circles for testing the stability of GNR@CTA (200 ug/ml) exposed to  $0.8 \text{ W}\cdot\text{cm}^{-2}$  808 nm laser irradiation.

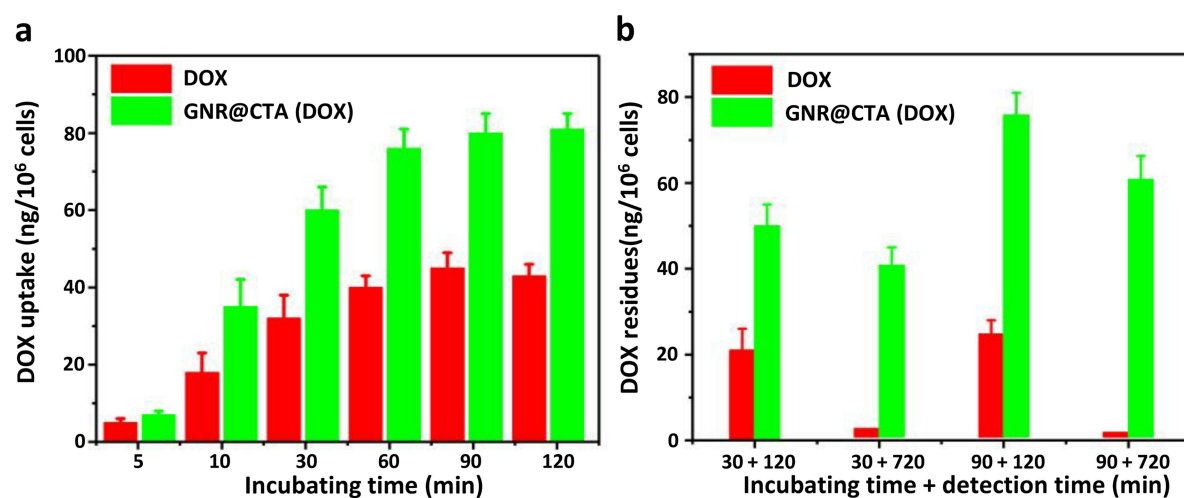

**Figure S2.** Photothermal efficiency analysis of GNP. (a) Compared the drug loading efficiency of DOX and GNR@CTA(DOX). (b) Compared the retention time of DOX in the cell.

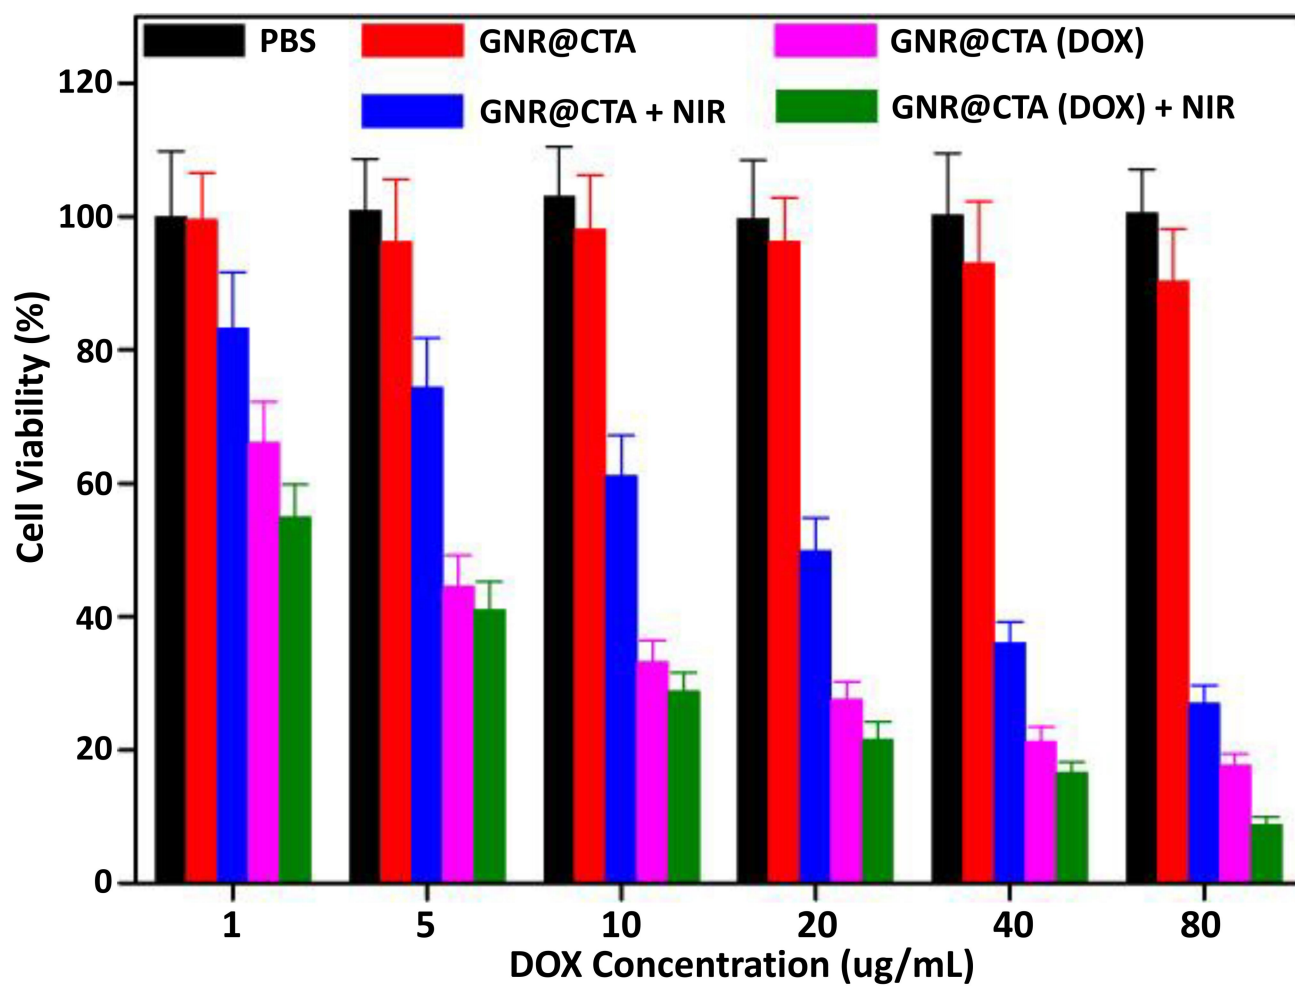

**Figure S3.** BT474 cells viability after incubation with different materials with or without 808 nm laser.

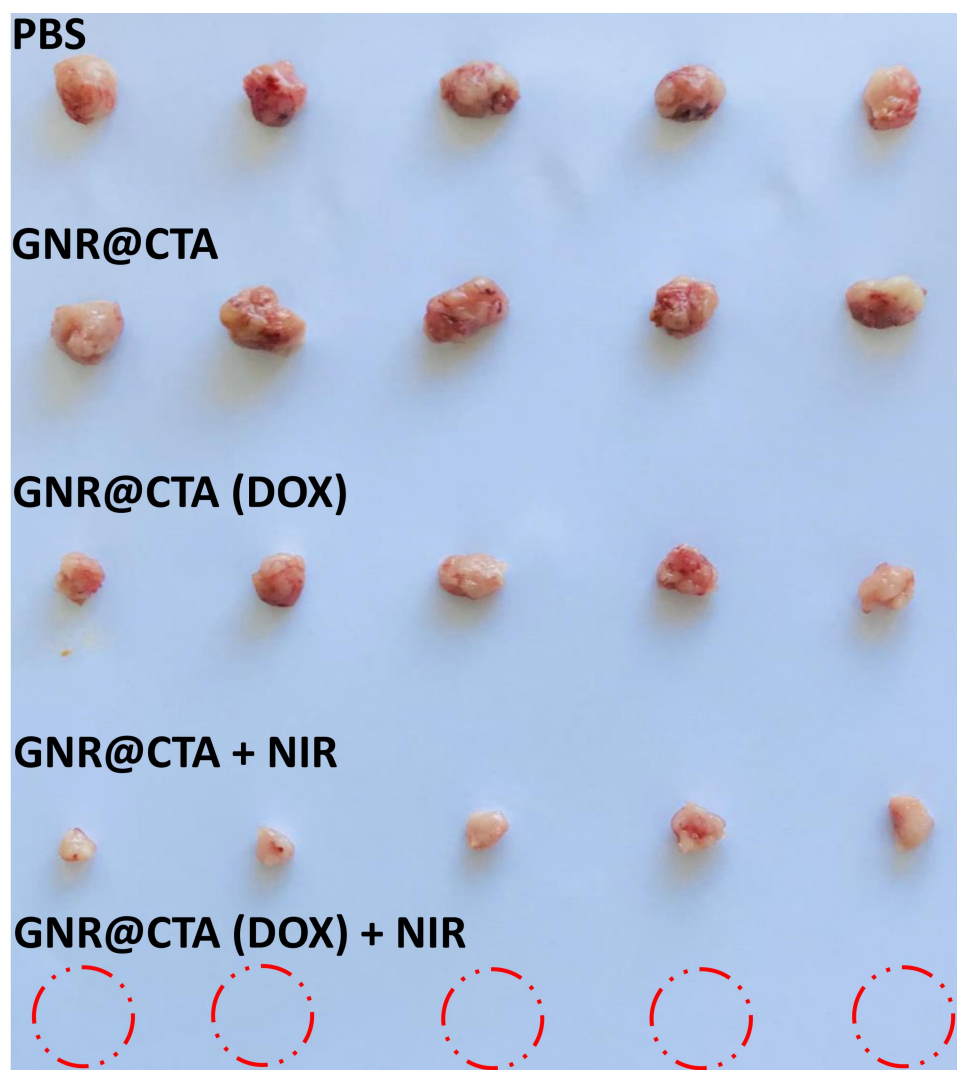

**Figure S4.** The photographs of dissected tumors from each group mice after different treatments.
